# Supplementary material for: Direct photoactivation of a nickel-based, water-reduction photocathode by a highly conjugated supramolecular chromophore
Source: Royal Society of Chemistry journal article supplement (doi:10.1039/c7ee03115g), 2018-01-01
Supplement: c7ee03115g1.pdf [file c7ee03115g1.pdf]

## Supplementary Information

---

### Direct Photoactivation of a Nickel-Based, Water-Reduction Photocathode by a Highly Conjugated Supramolecular Chromophore

Bing Shan,<sup>†</sup> Animesh Nayak,<sup>†</sup> Renato N. Sampaio, Michael S. Eberhart, Ludovic Troian-Gautier,  
M. Kyle Brennaman, Gerald J. Meyer and Thomas J. Meyer\*

Department of Chemistry, University of North Carolina at Chapel Hill, Chapel Hill, NC 27599-3290, United States

<sup>†</sup> These authors contributed equally to this work.

\*Corresponding author.

#### Table of Contents

|                                                                                                                                                                |     |
|----------------------------------------------------------------------------------------------------------------------------------------------------------------|-----|
| Figure S1. Scheme on synthesis of ZnPRu <sup>2+</sup> -----                                                                                                    | S2  |
| Figure S2. <sup>1</sup> H NMR (400 MHz) of the precursor RuPZnE -----                                                                                          | S3  |
| Figure S3. <sup>1</sup> H NMR (400 MHz) of ZnPRu <sup>2+</sup> -----                                                                                           | S4  |
| Figure S4. Surface SEM of the photocathodes -----                                                                                                              | S5  |
| Figure S5. LSV of the photocathodes showing the deposition cycles dependence -----                                                                             | S5  |
| Figure S6. LSV of the photocathode under dark or illumination-----                                                                                             | S6  |
| Figure S7. LSV of the photocathodes showing the pH dependence -----                                                                                            | S6  |
| Figure S8. Photocurrents showing long-term PEC-----                                                                                                            | S7  |
| Figure S9. Photocurrents for NiO ZnP NiMo <sub>0.05</sub> S <sub>x</sub> and NiO Ru(tpy) <sub>2</sub> <sup>2+</sup>  NiMo <sub>0.05</sub> S <sub>x</sub> ----- | S7  |
| Figure S10. nsTA of Al <sub>2</sub> O <sub>3</sub>  ZnPRu <sup>2+</sup> -----                                                                                  | S8  |
| Figure S11. Time-resolved nsTA of Al <sub>2</sub> O <sub>3</sub>  ZnPRu <sup>2+</sup> at 440 nm -----                                                          | S8  |
| Figure S12. Nyquist plots for the photocathode after proton intercalation -----                                                                                | S9  |
| Calculation of Faradaic efficiency and quantum yield of H <sub>2</sub> . -----                                                                                 | S10 |

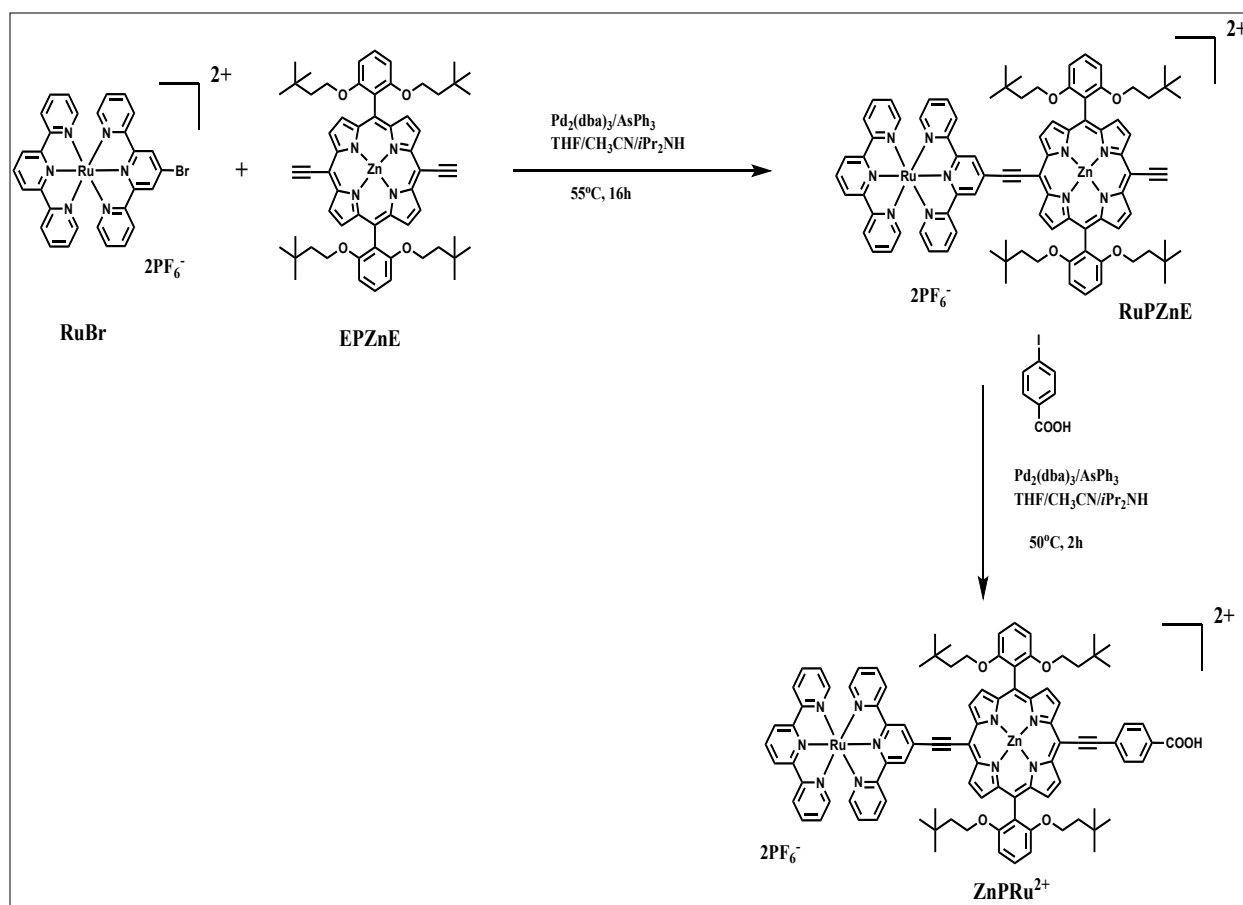

Figure S1. Simplified scheme for the synthetic procedure of  $\text{ZnPRu}^{2+}$ .

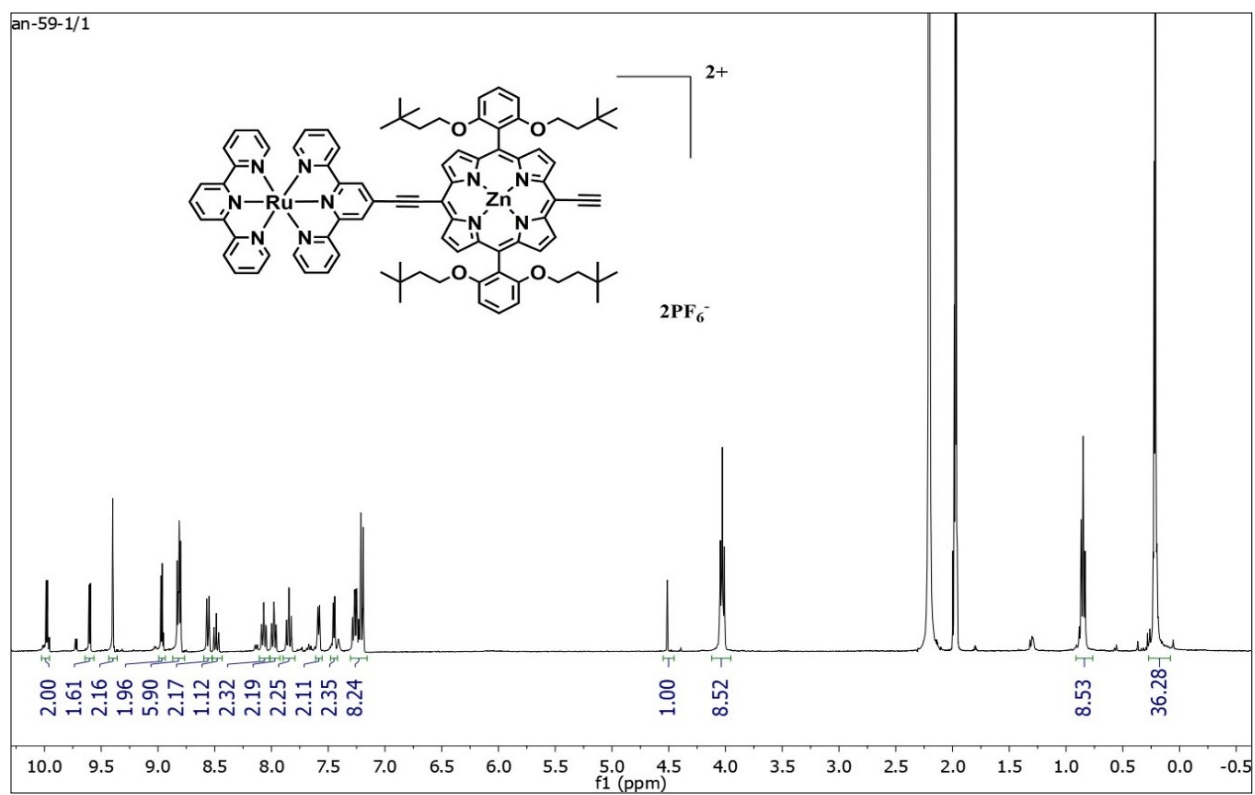

Figure S2.  $^1\text{H}$  NMR (400 MHz) of RuPZnE in  $\text{CD}_3\text{CN}$ .

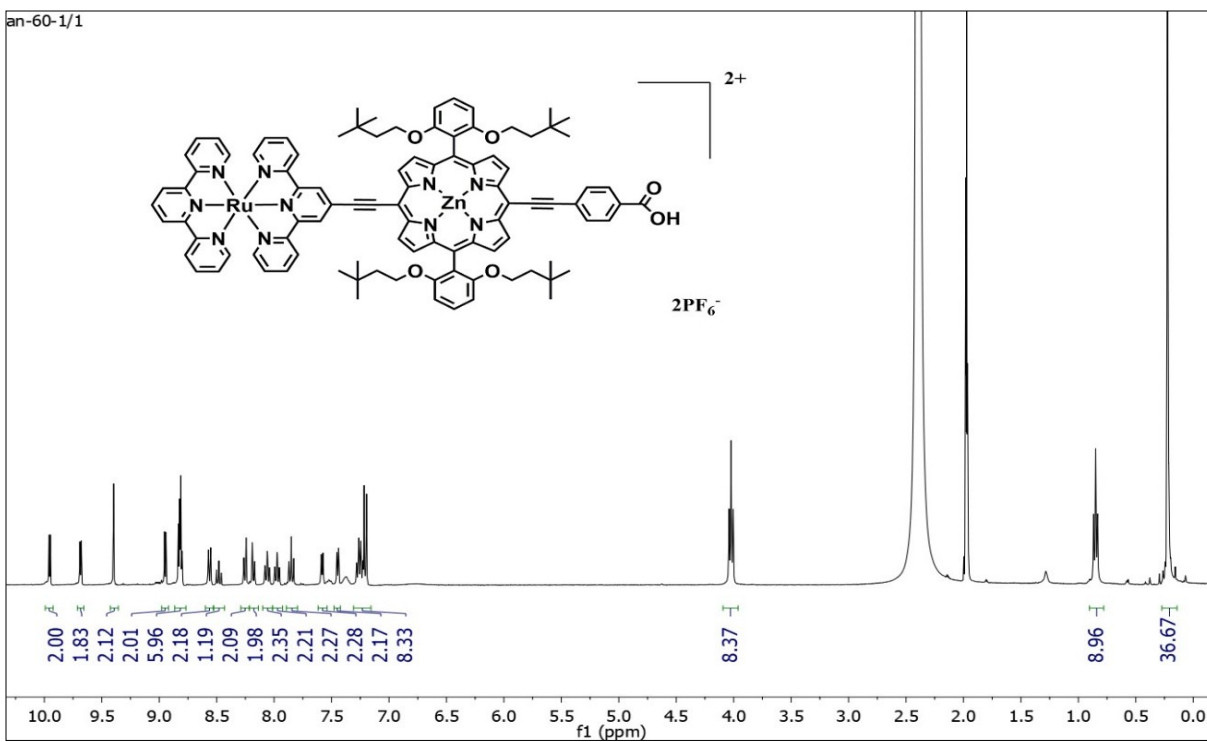

Figure S3.  $^1\text{H}$  NMR (400 MHz) of  $\text{ZnPRu}^{2+}$  in  $\text{CD}_3\text{CN}$ .

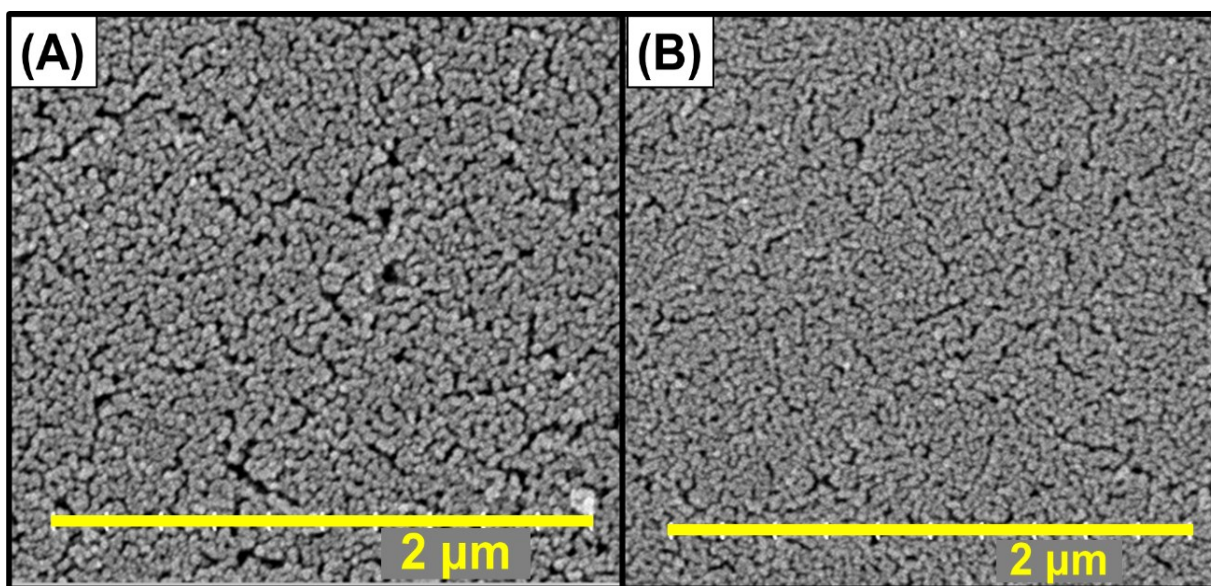

Figure S4. Surface SEM of the photocathodes NiO|ZnPRu<sup>2+</sup>|NiMo<sub>0.05</sub>S<sub>x</sub> (A) and NiO|ZnPRu<sup>2+</sup> (B).

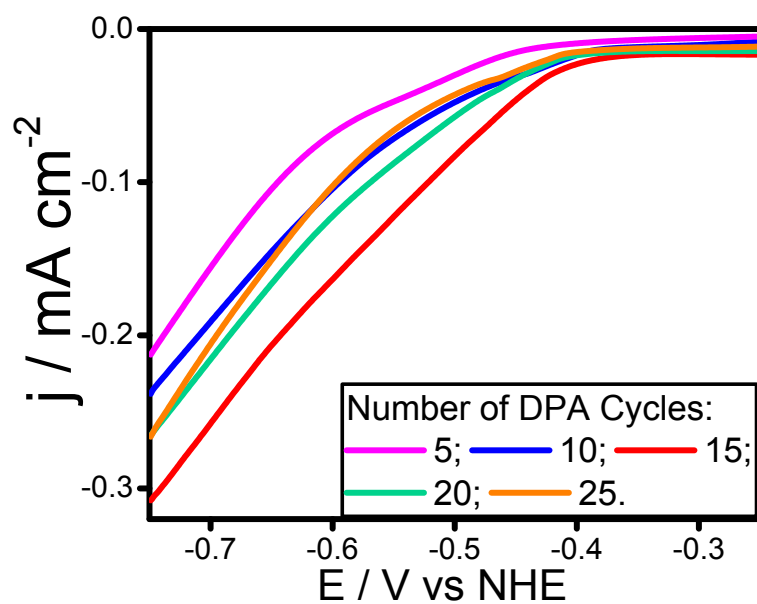

Figure S5. Linear sweep voltammograms of NiO|ZnPRu<sup>2+</sup>|NiMo<sub>0.05</sub>S<sub>x</sub> with the catalyst from various DPA cycles in pH 4.5 acetate buffer.

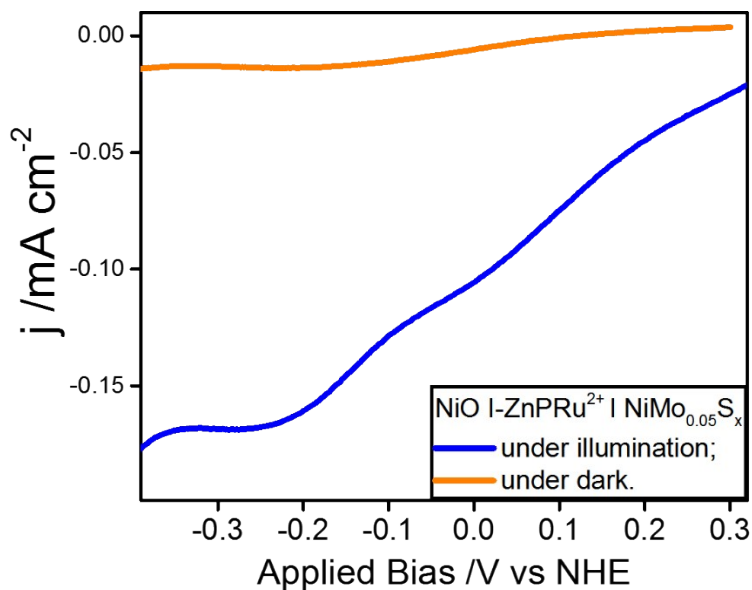

Figure S6. Linear sweep voltammograms for NiO|ZnPRu<sup>2+</sup>|NiMo<sub>0.05</sub>S<sub>x</sub> under dark (orange trace) or illumination (10 mW/cm<sup>2</sup> blue LED) (blue trace) in pH 4.5 acetate buffer. Scan rate: 5 mV/s.

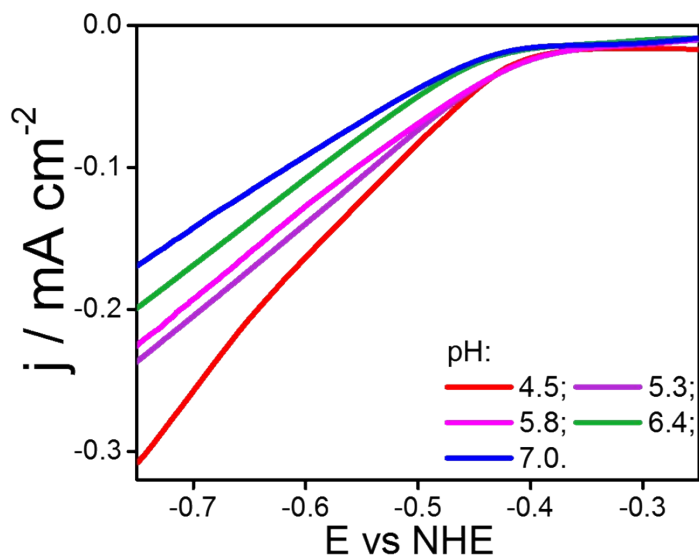

Figure S7. Linear sweep voltammograms of NiO|ZnPRu<sup>2+</sup>|NiMo<sub>0.05</sub>S<sub>x</sub> with the catalyst from 15-cycle DPA in pH 4.5-7.0 buffers.

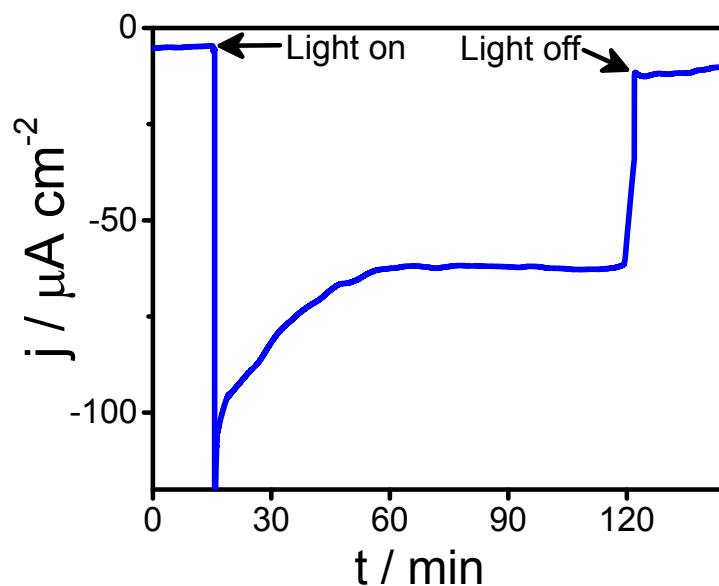

Figure S8. Photocurrents ( $j/\mu\text{A cm}^{-2}$ ) showing long-term photoelectrocatalysis by the photocathode  $\text{NiO|ZnPRu}^{2+}\text{|NiMo}_{0.05}\text{S}_x$  with catalyst form 15-cycle DPA and in pH 4.5 acetate buffer with an applied bias of -0.05 V vs NHE.

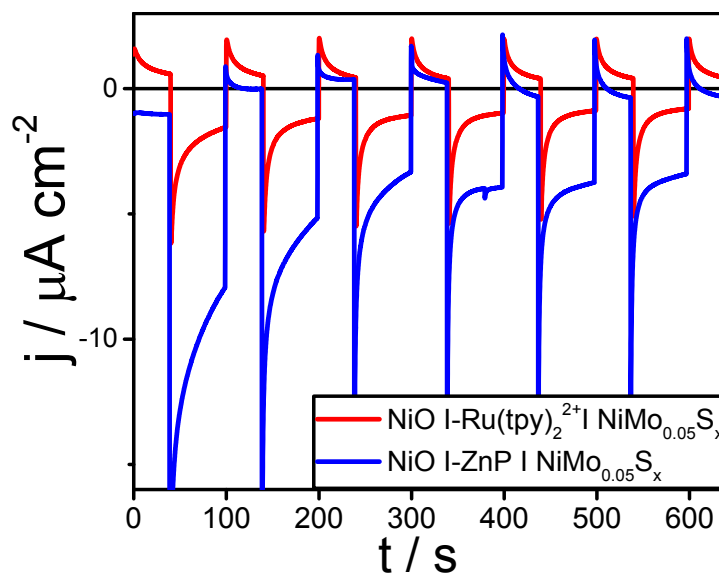

Figure S9. Photocurrents for  $\text{NiO|Ru(tpy)}_2^{2+}\text{|NiMo}_{0.05}\text{S}_x$  (red curve) and  $\text{NiO|ZnP|NiMo}_{0.05}\text{S}_x$  (blue curve) in pH 4.5 acetate buffer with an applied bias of -0.05 V vs NHE.

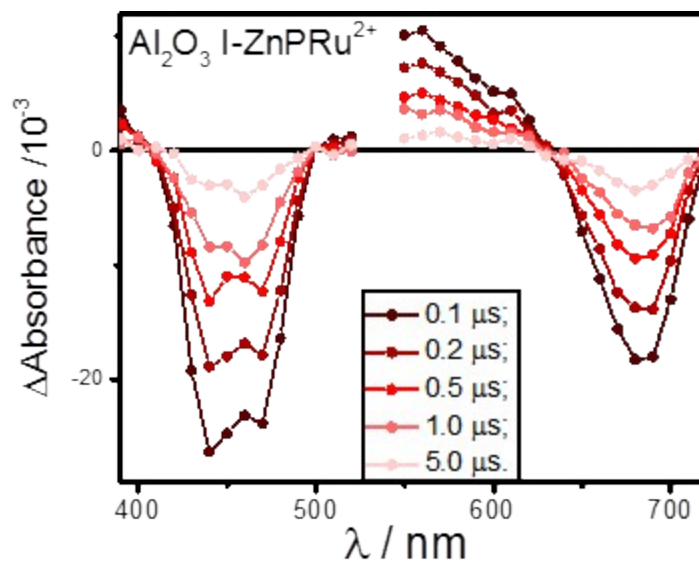

Figure S10. Nanosecond transient absorption (*nsTA*) following excitation of  $\text{Al}_2\text{O}_3|\text{ZnPRu}^{2+}$  at 532 nm as a function of time delay after the laser pulses. Solution medium:  $\text{N}_2$  degassed pH 4.5 acetate buffer.

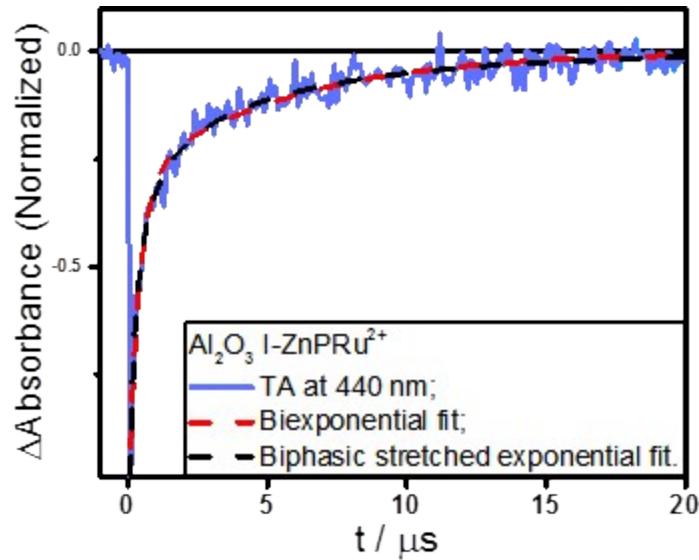

Figure S11. Time-resolved *nsTA* at 440 nm following excitation of  $\text{Al}_2\text{O}_3|\text{ZnPRu}^{2+}$  at 532 nm (blue, solid), biexponential fit (red, dashed) and biphasic stretched exponential fit (black, dashed). Solution medium:  $\text{N}_2$  degassed pH 4.5 acetate buffer (aq., 0.1 M).

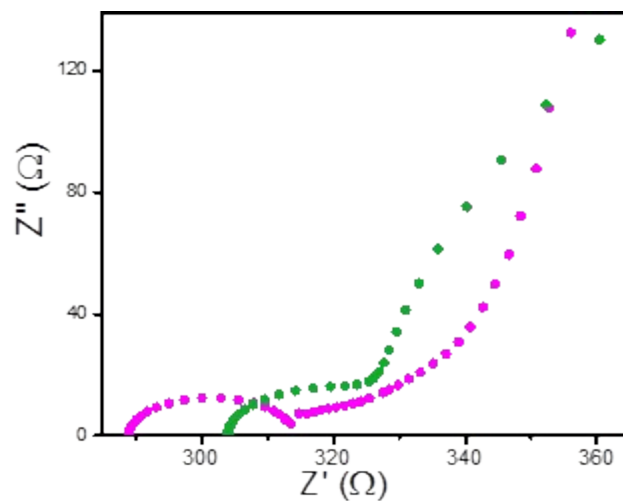

Figure S12. Nyquist plots for a photocathode  $\text{NiO}|\text{-ZnPRu}^{2+}|\text{NiMo}_{0.05}\text{S}_x$  after immersion in pH 4.5 buffer for 3 hours in the dark (pink) and a photocathode  $\text{NiO}|\text{-ZnPRu}^{2+}|\text{NiMo}_{0.05}\text{S}_x$  after 3-hour PEC (green). Comparison of the Nyquist plots indicates that proton intercalation is not a main cause for the increased resistance in charge transfer and contact surface of the “degraded” photocathode.

### Faradaic Efficiency and Quantum Yield of Hydrogen Calculation.

The Faradaic efficiency was determined by the equation, Faradaic efficiency =  $\frac{\text{mols of } H_2 \times 2}{\text{moles of electrons}}$ . Based on the photocurrent results in Figure S6 and the quantification of hydrogen evolution from Gas Chromatography measurements, the Faradaic efficiency was determined to be 78.5±2.4% over 2-hour period of photoelectrocatalysis.

The quantum yield of hydrogen was determined to be 1.29±0.04%, according to the equation,

$$\eta_{QY} = \frac{n(H_2) \times N_A \times h \times c \times 2}{\lambda \times t \times I \times A}$$
, with n(H<sub>2</sub>): moles of H<sub>2</sub> (moles), N<sub>A</sub>: Avogadro constant (6.02×10<sup>23</sup> mol<sup>-1</sup>), h: Planck constant (6.63×10<sup>-34</sup> kg m<sup>2</sup> s<sup>-1</sup>), c: speed of light (3.0×10<sup>8</sup> m s<sup>-1</sup>), λ: wavelength (4.45×10<sup>-7</sup> m), t: irradiation time (s), I: light intensity (0.01 W m<sup>-2</sup>) and A: irradiated area (1.0 m<sup>2</sup>).
